# Supplementary material for: The antitumor activity of 4,4′-bipyridinium amphiphiles
Source: Royal Society of Chemistry journal article supplement (doi:10.1039/c9ra06172j), 2019-01-01
Supplement: c9ra06172j1.pdf [file c9ra06172j1.pdf]

## **The Antitumor Activity of 4,4'-Bipyridinium Amphiphiles**

Senlin Wang<sup>a</sup>, Hongshuai Wu<sup>a</sup>, Fanghui Chen<sup>a</sup>, Yu Zhang<sup>a</sup>, Yuchen Zhang<sup>a</sup>, and  
Baiwang Sun<sup>a,\*</sup>

<sup>a</sup> *School of Chemistry and Chemical Engineering, Southeast University, Nanjing  
211189, PR China. Fax: +86 25 52090614, Tel: +86 25 52090614, E-mail address:  
[chmsunbw@seu.edu.cn](mailto:chmsunbw@seu.edu.cn)*

(a)

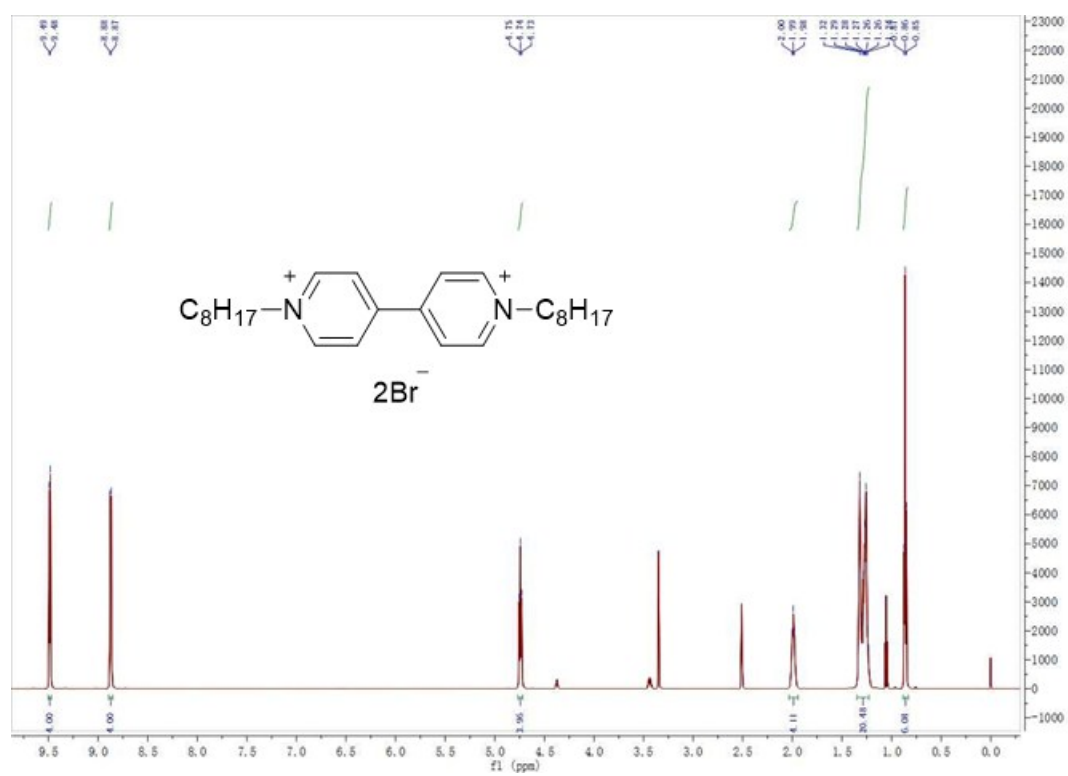

(b)

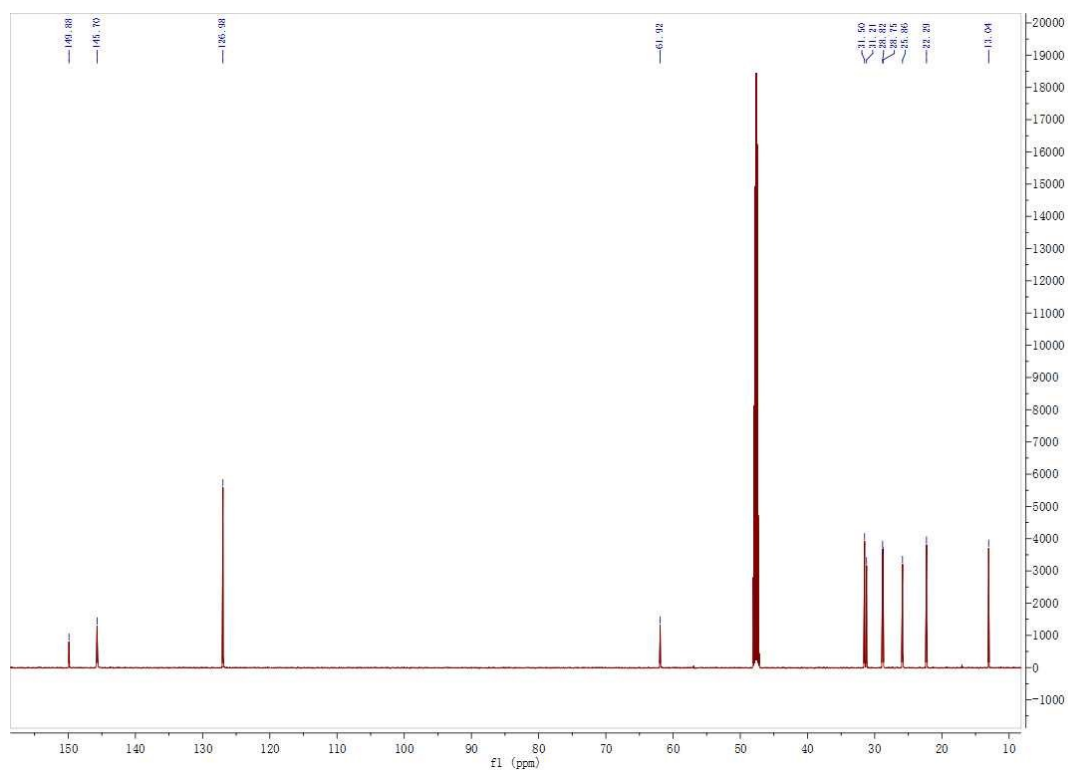

(c)

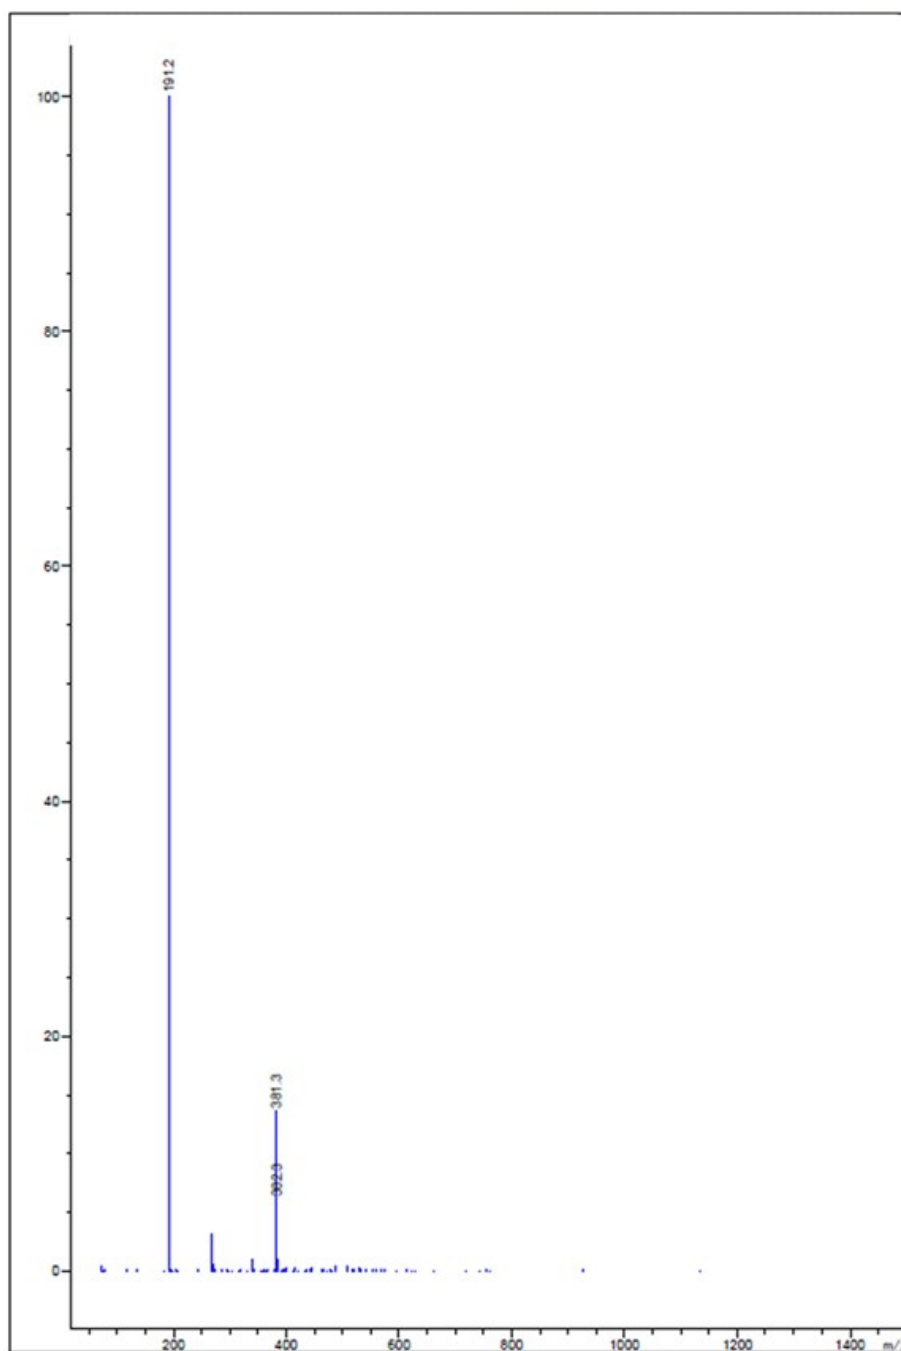

**Figure S1.** NMR and MS spectra of **1**: (a)  $^1\text{H}$  NMR spectrum of **1** in  $\text{DMSO-}d_6$ ; (b)  $^{13}\text{C}$  NMR spectrum of **1** in  $\text{CD}_3\text{OD}$ ; (c) MS spectra of **1**.

(a)

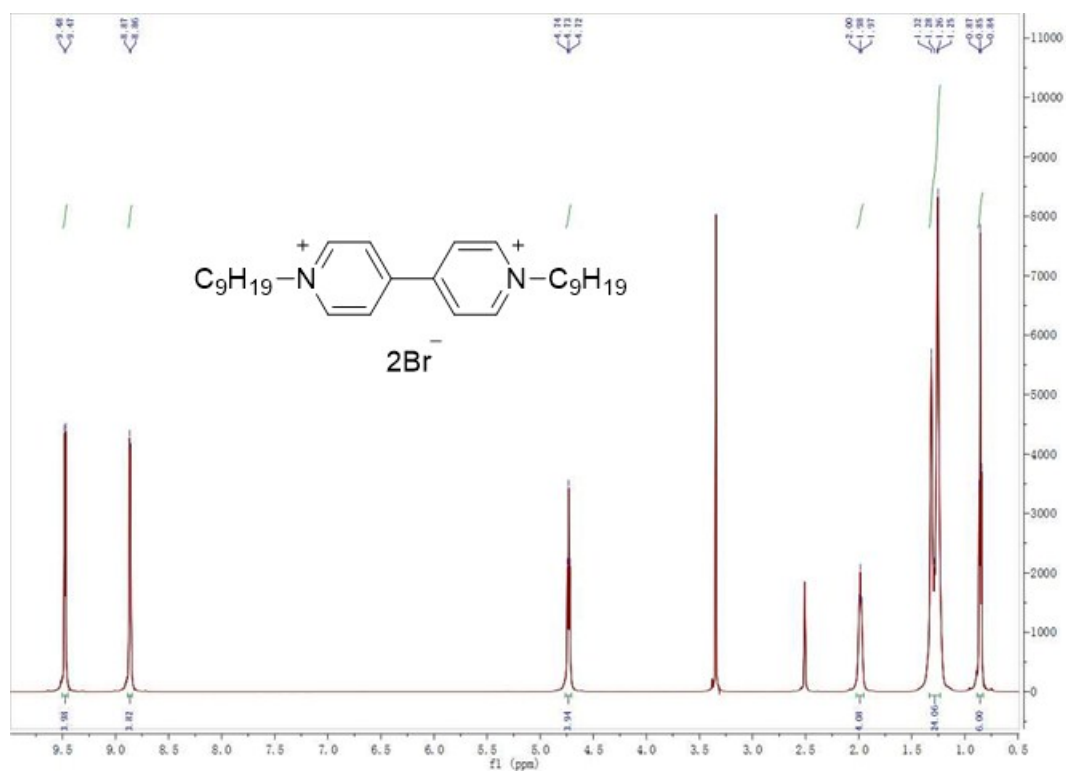

(b)

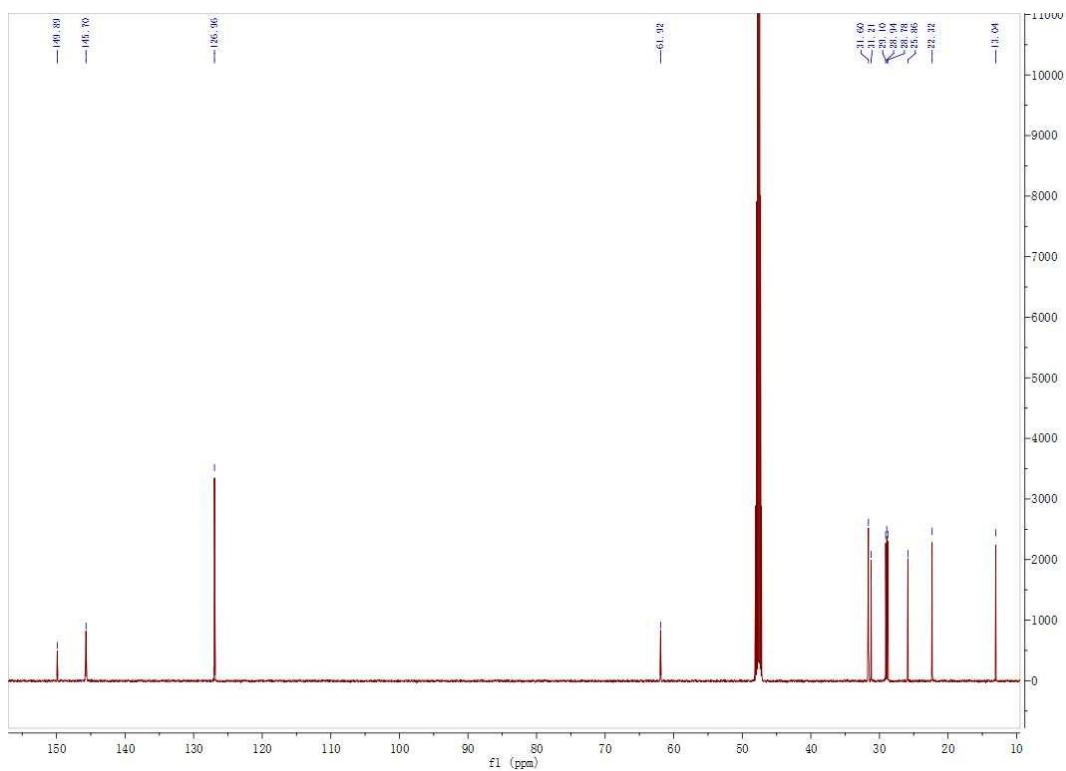

(c)

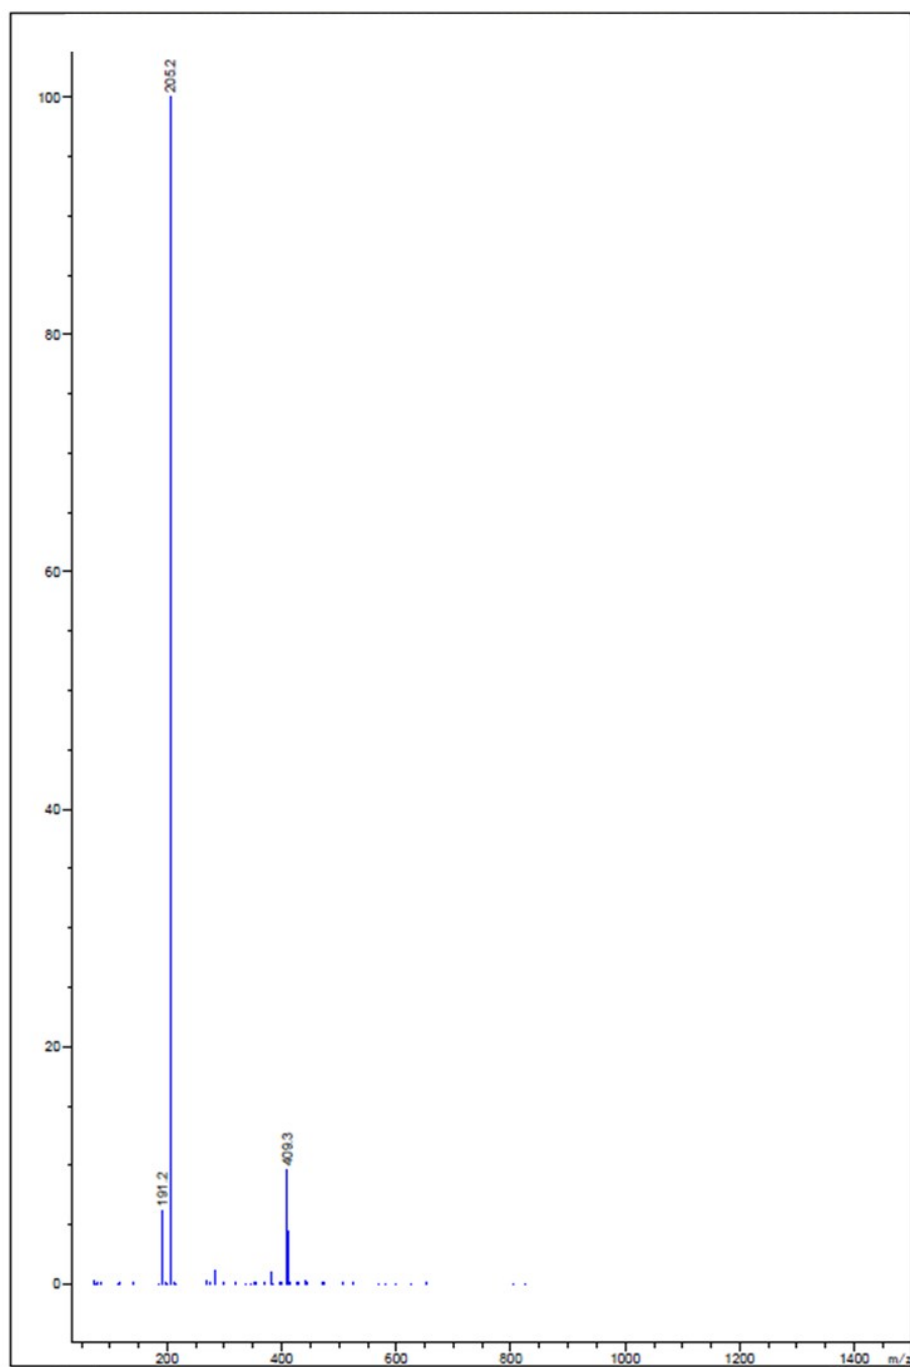

**Figure S2.** NMR and MS spectra of **2**: (a)  $^1\text{H}$  NMR spectrum of **2** in  $\text{DMSO-}d_6$ ; (b)  $^{13}\text{C}$  NMR spectrum of **2** in  $\text{CD}_3\text{OD}$ ; (c) MS spectra of **2**.

(a)

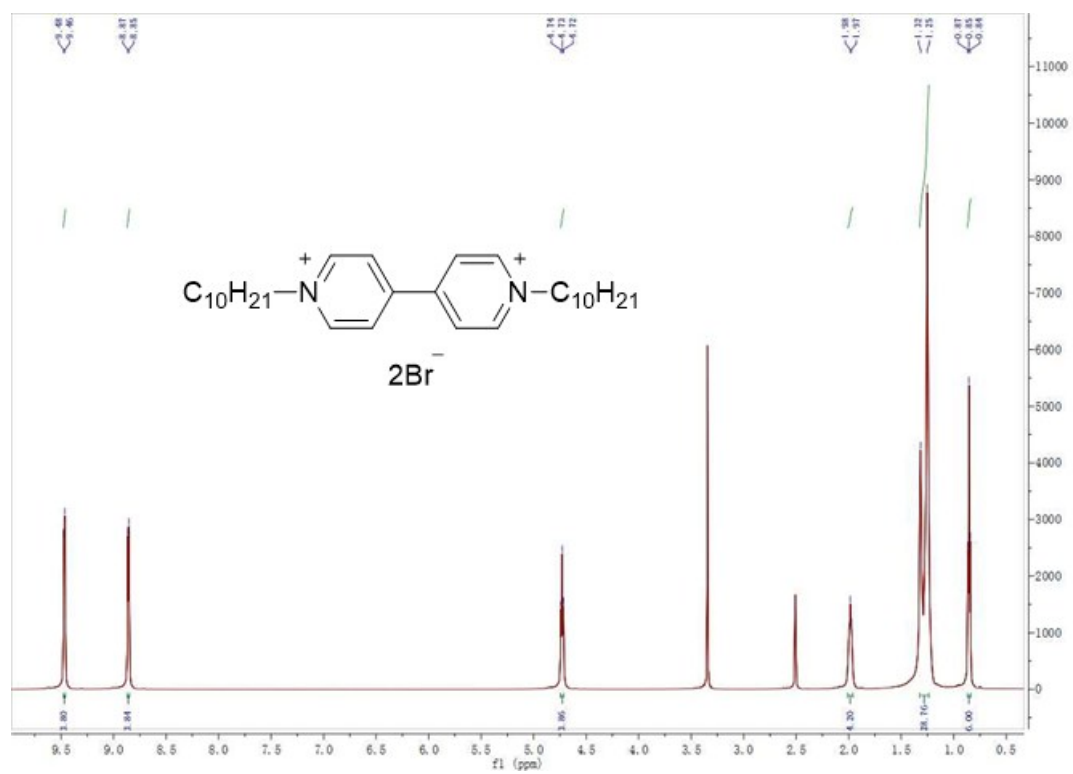

(b)

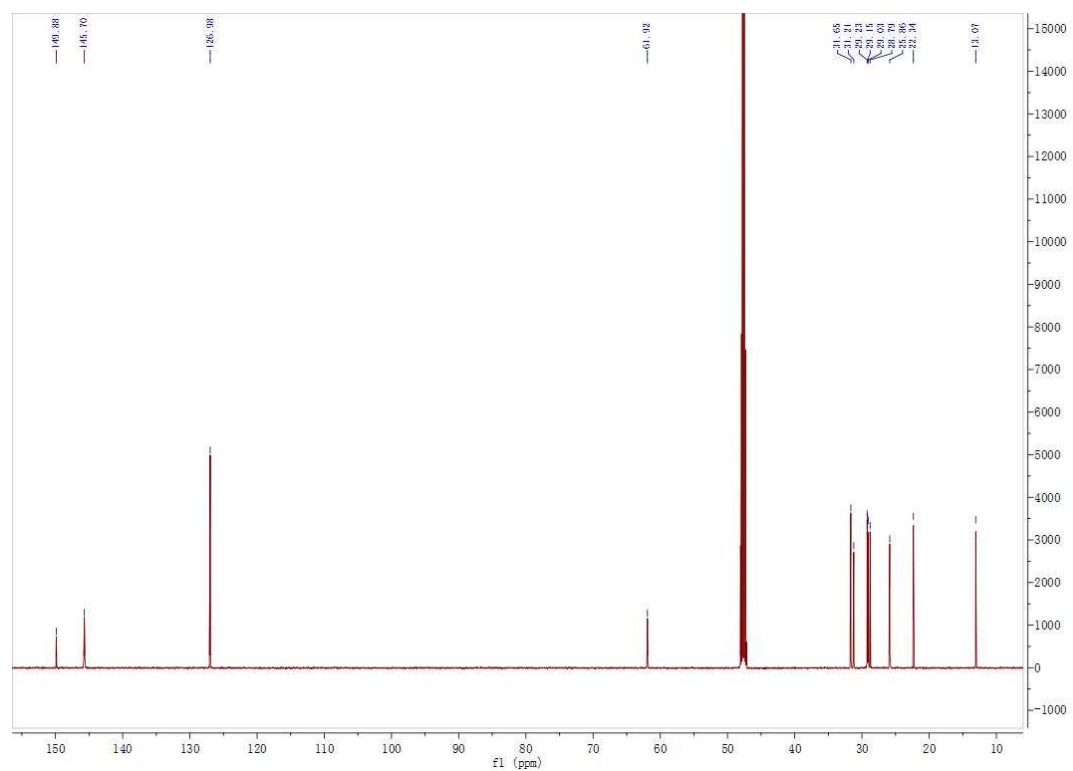

(c)

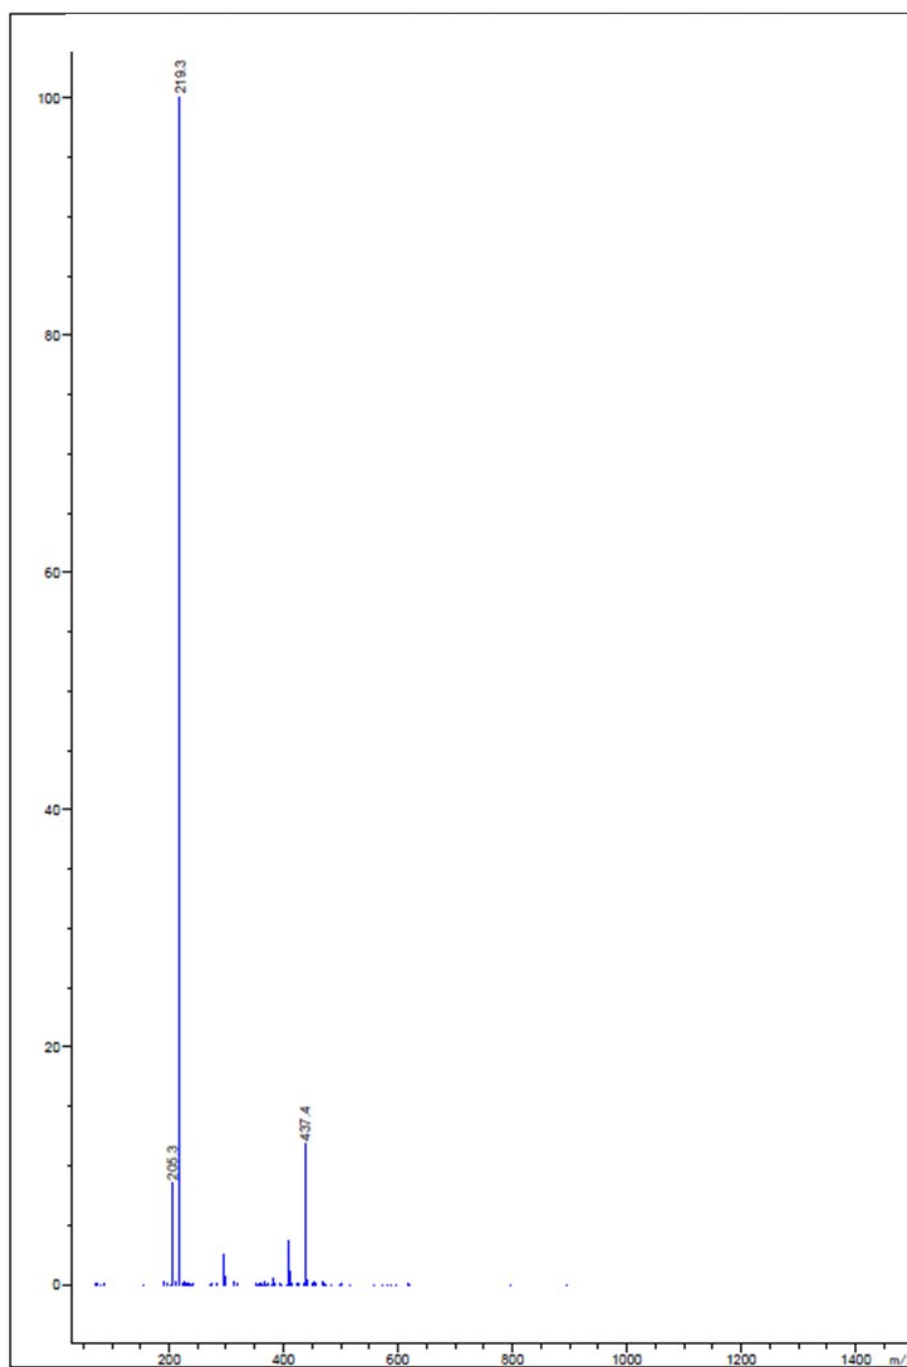

**Figure S3.** NMR and MS spectra of **3**: (a)  $^1\text{H}$  NMR spectrum of **3** in  $\text{DMSO-}d_6$ ; (b)  $^{13}\text{C}$  NMR spectrum of **3** in  $\text{CD}_3\text{OD}$ ; (c) MS spectra of **3**.

(a)

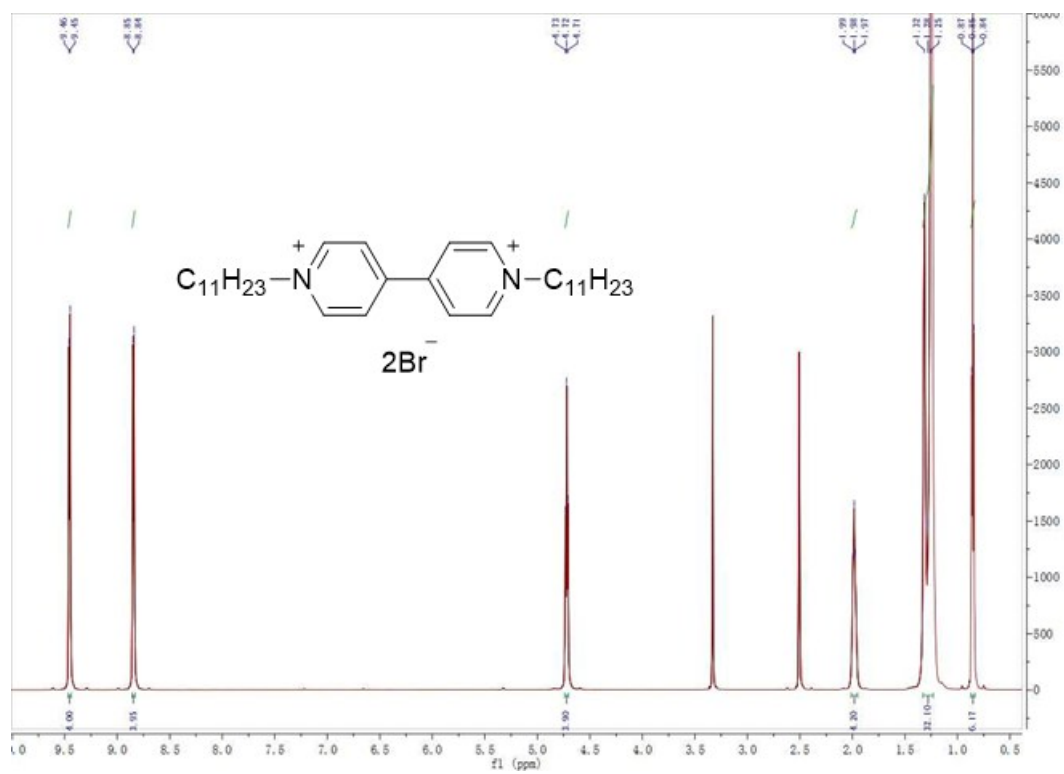

(b)

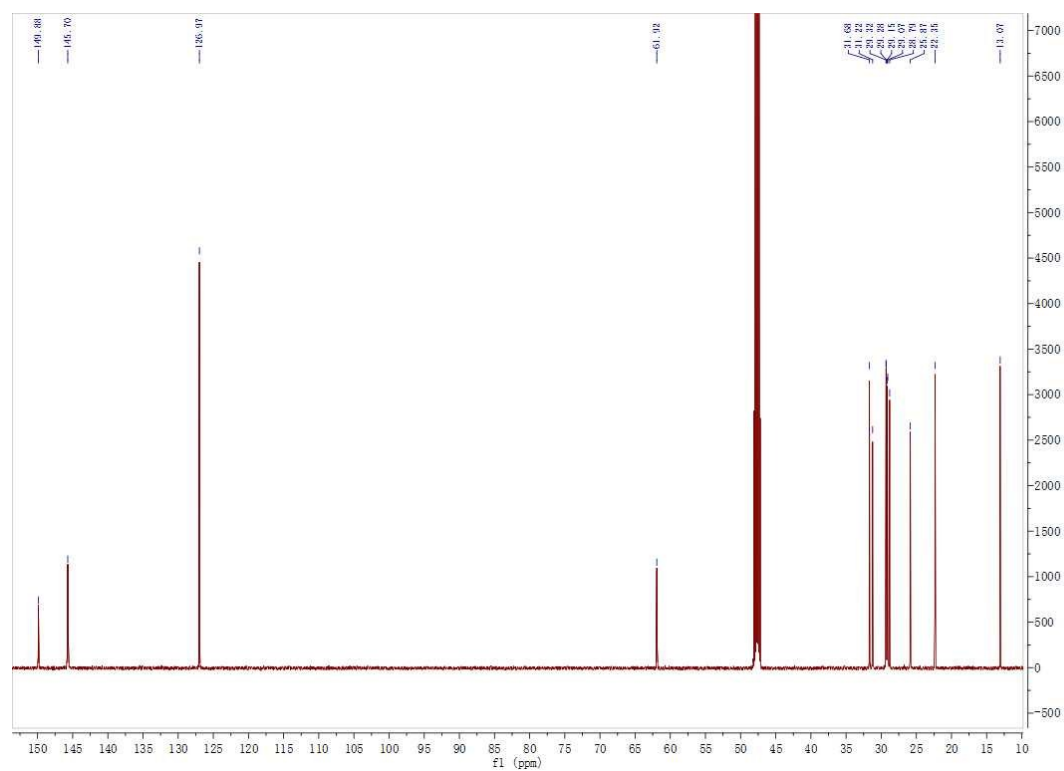



(c)

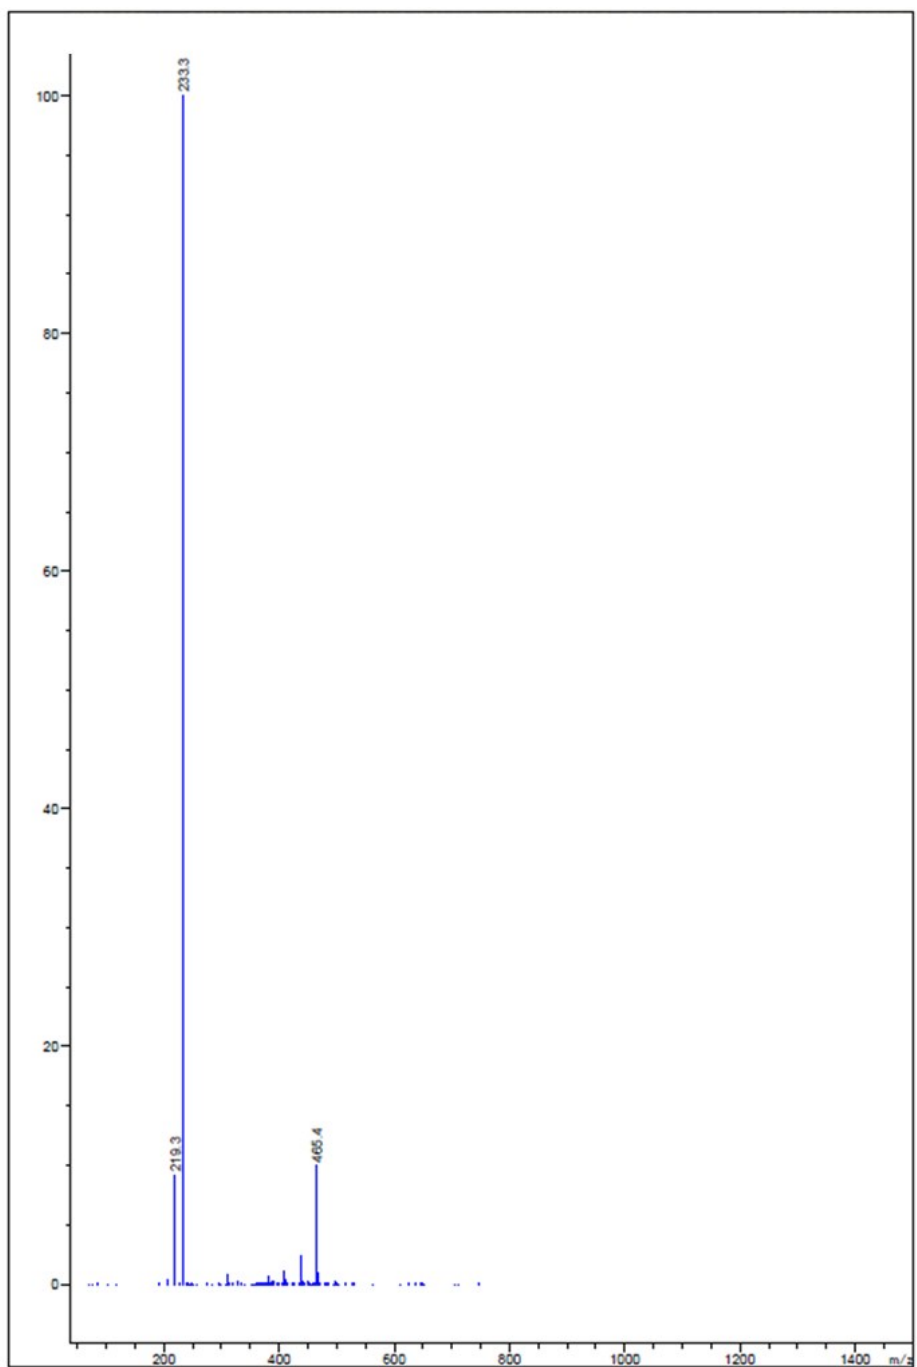

**Figure S4.** NMR and MS spectra of **4**: (a)  $^1\text{H}$  NMR spectrum of **4** in  $\text{DMSO-}d_6$ ; (b)  $^{13}\text{C}$  NMR spectrum of **4** in  $\text{CD}_3\text{OD}$ ; (c) MS spectra of **4**.

(a)

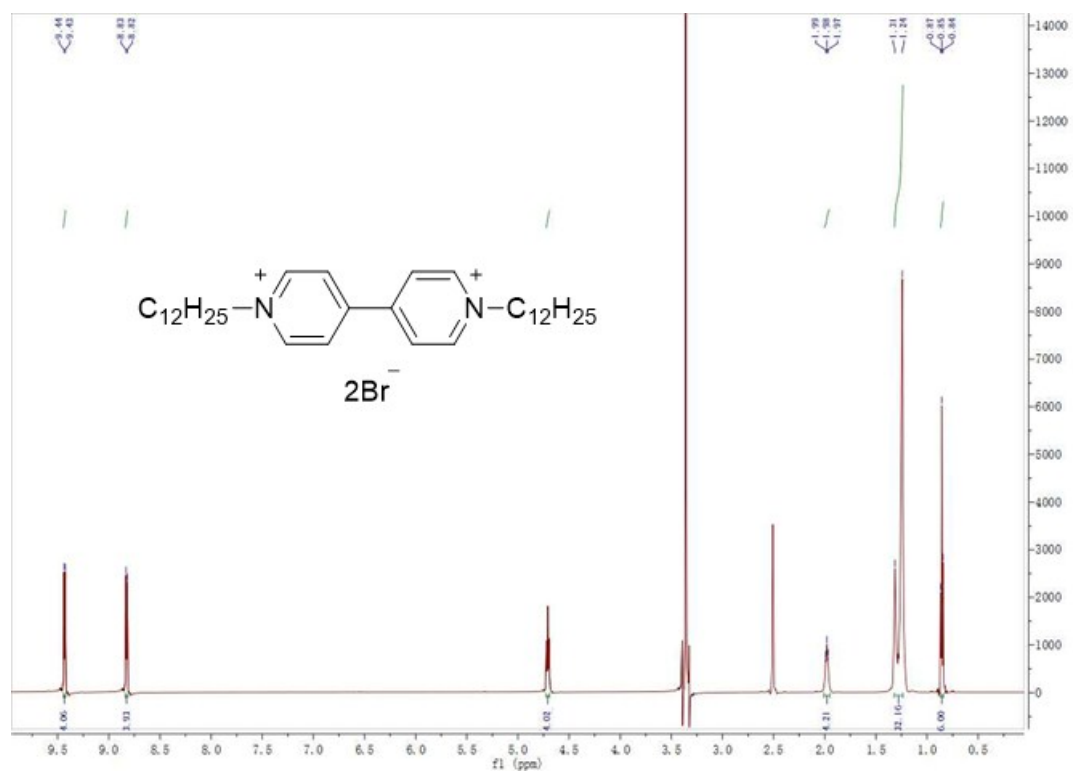

(b)

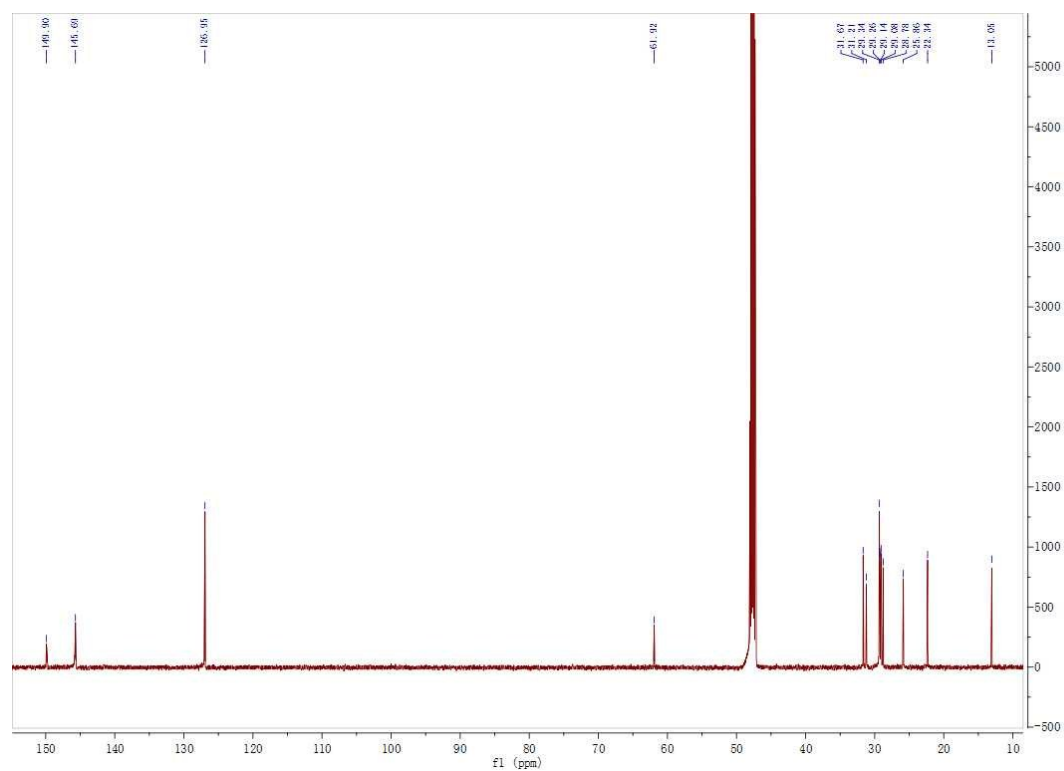

(c)

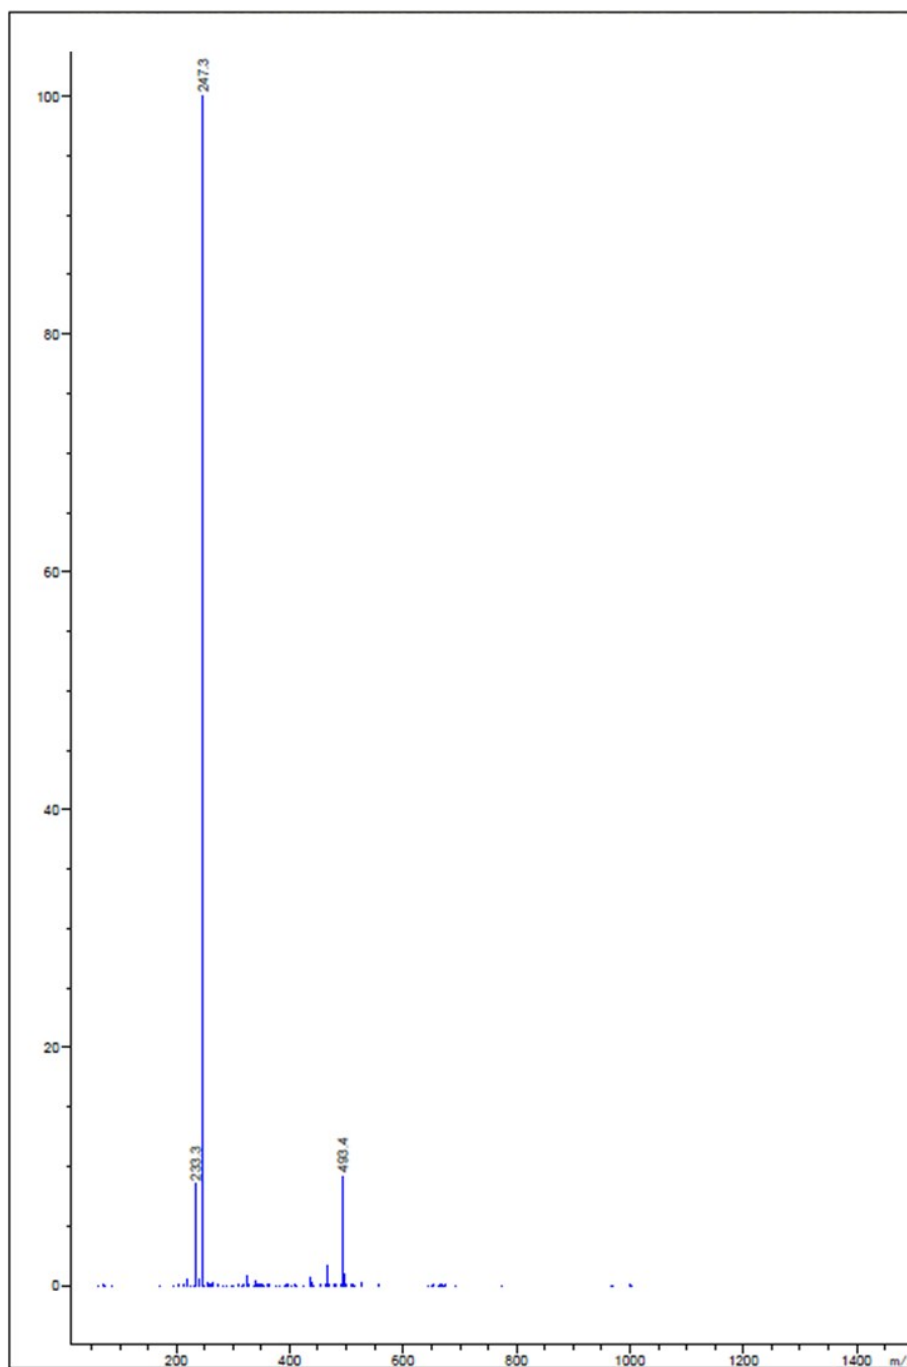

**Figure S5.** NMR and MS spectra of **5**: (a)  $^1\text{H}$  NMR spectrum of **5** in  $\text{DMSO-}d_6$ ; (b)  $^{13}\text{C}$  NMR spectrum of **5** in  $\text{CD}_3\text{OD}$ ; (c) MS spectra of **5**.

(a)

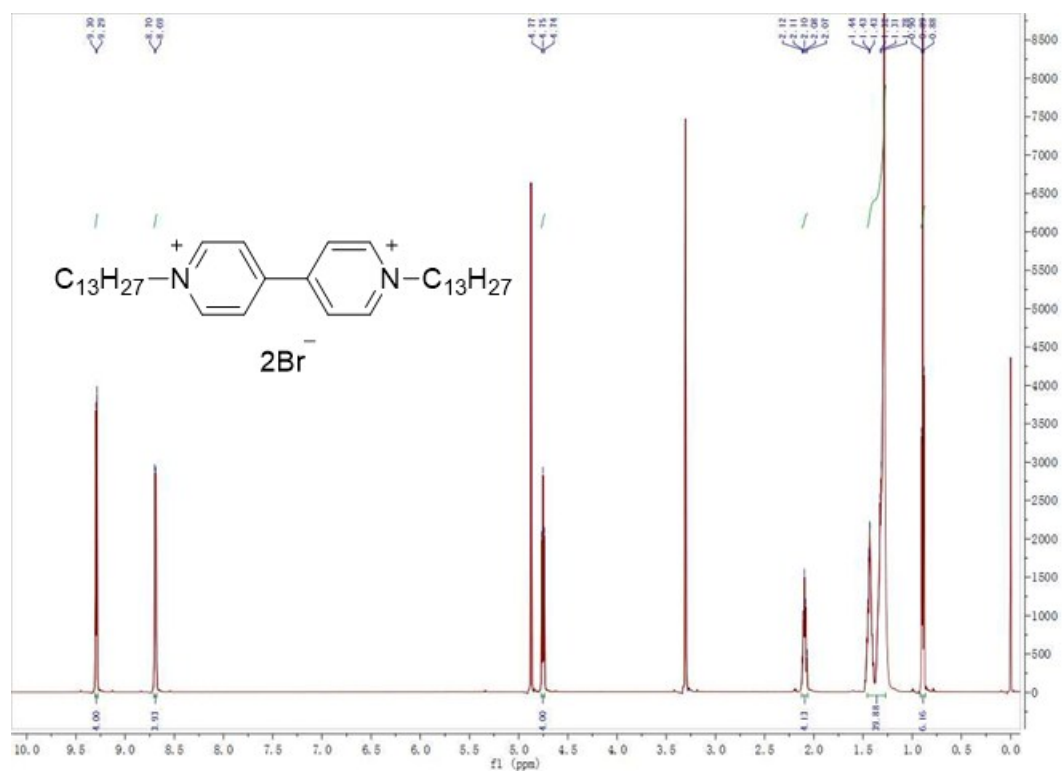

(b)

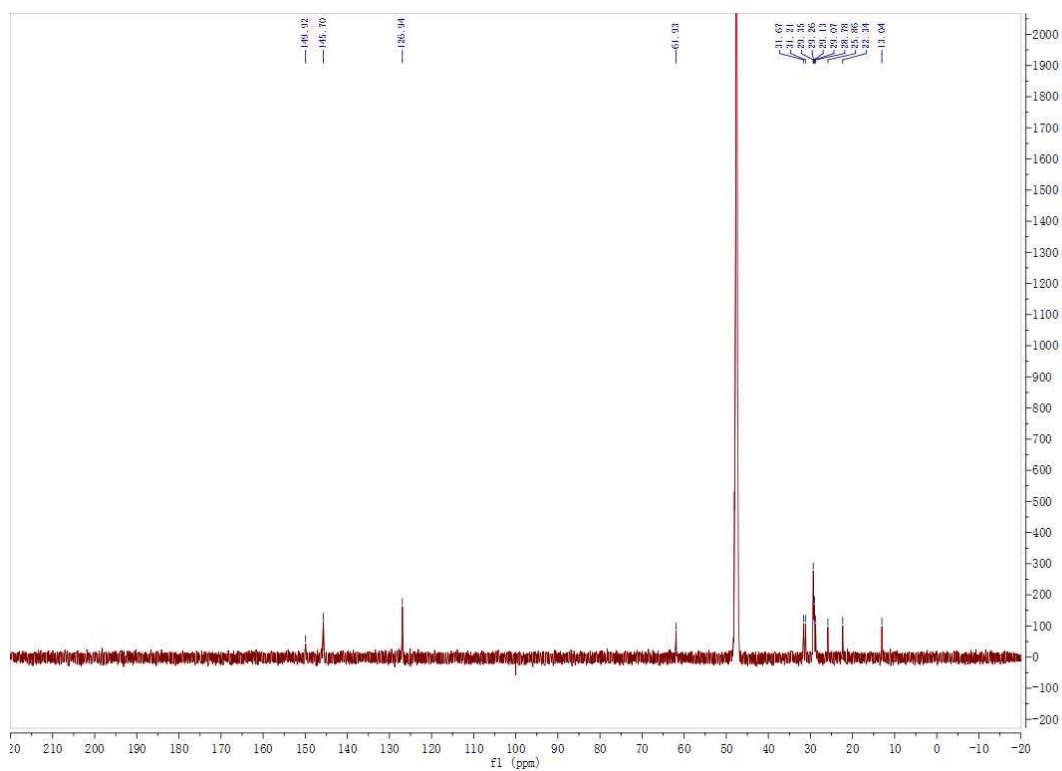

(c)

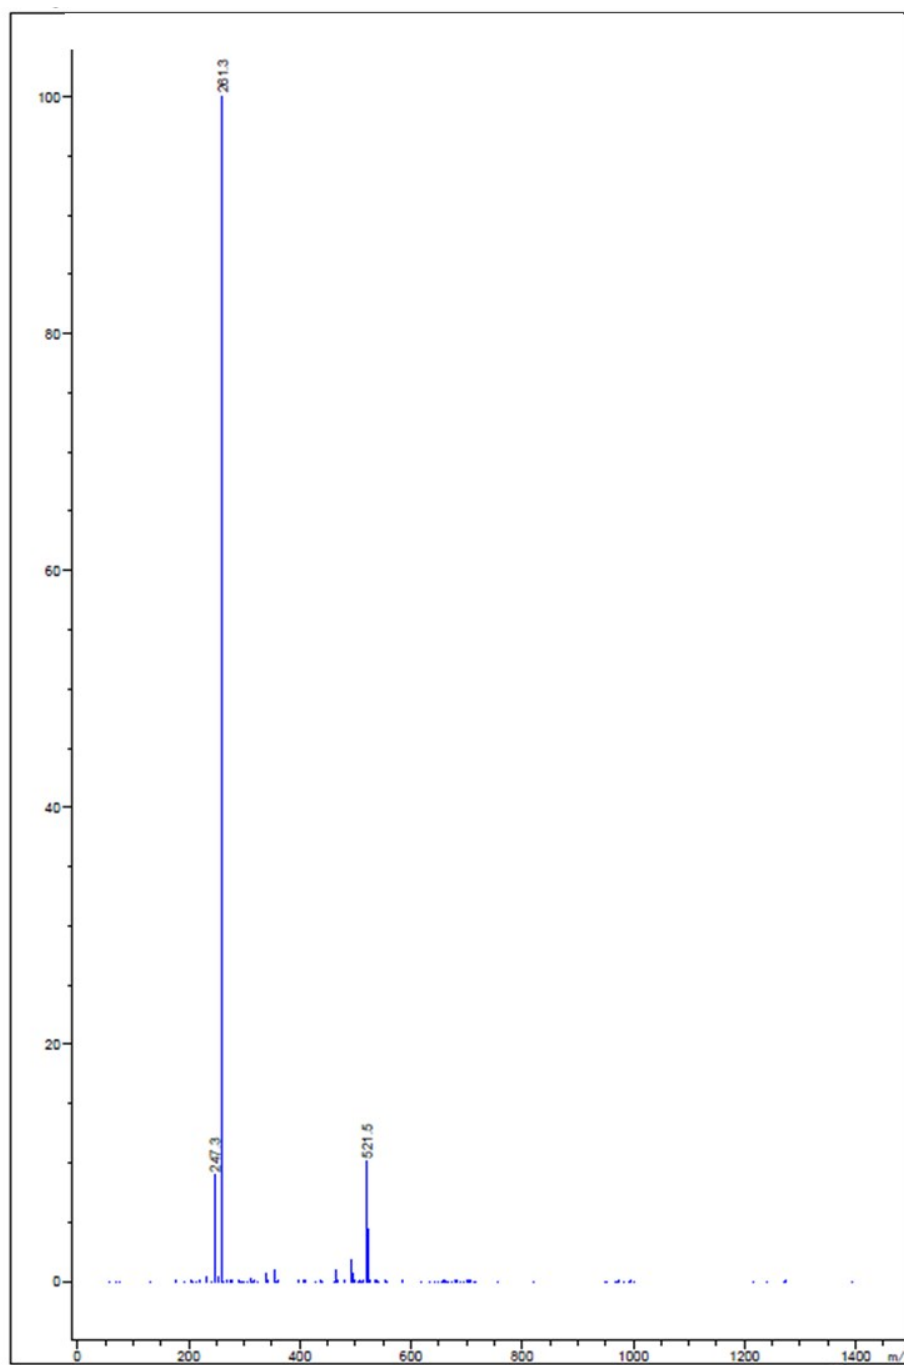

**Figure S6.** NMR and MS spectra of **6**: (a)  $^1\text{H}$  NMR spectrum of **6** in  $\text{CD}_3\text{OD}$ ; (b)  $^{13}\text{C}$  NMR spectrum of **6** in  $\text{CD}_3\text{OD}$ ; (c) MS spectra of **6**.

(a)

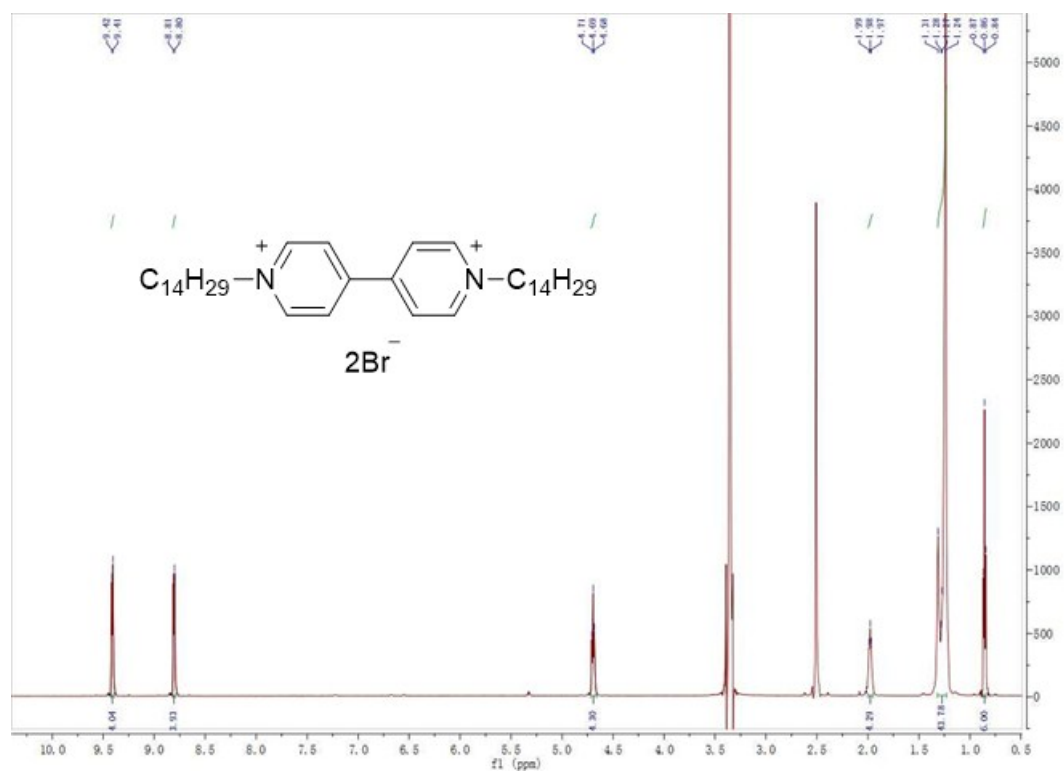

(b)

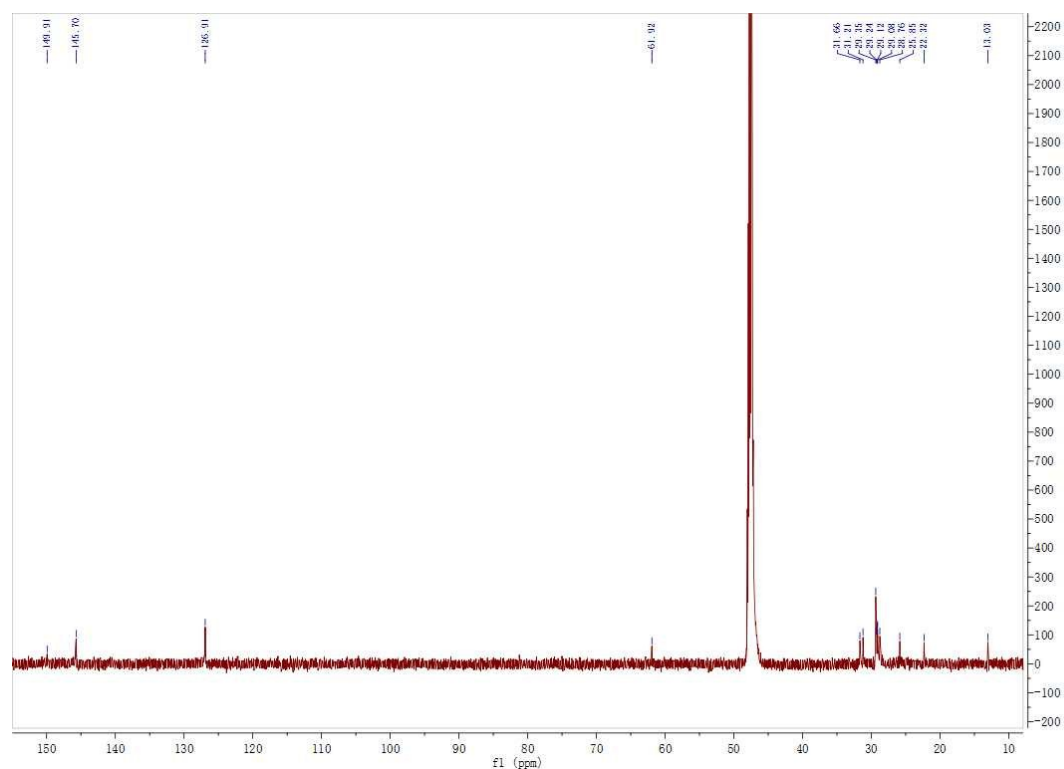

**Figure S7.** (a)  $^1\text{H}$  NMR spectrum of **7** in  $\text{DMSO}-d_6$ ; (b)  $^{13}\text{C}$  NMR spectrum of **7** in  $\text{CD}_3\text{OD}$ .

(a)

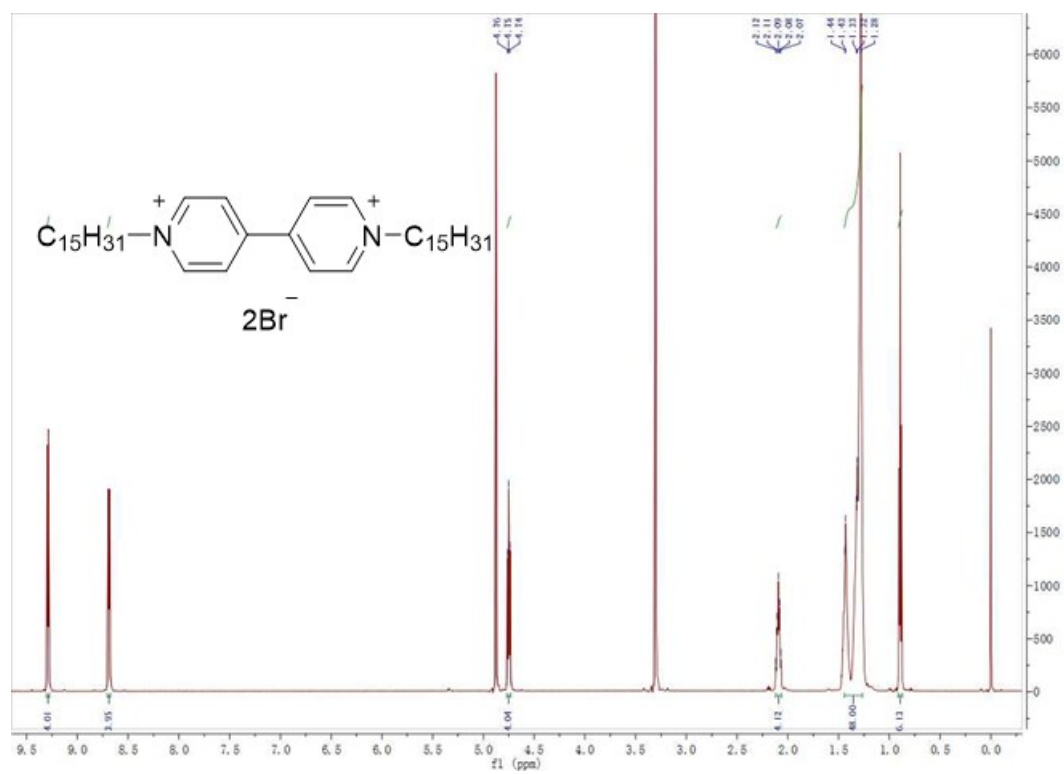

(b)

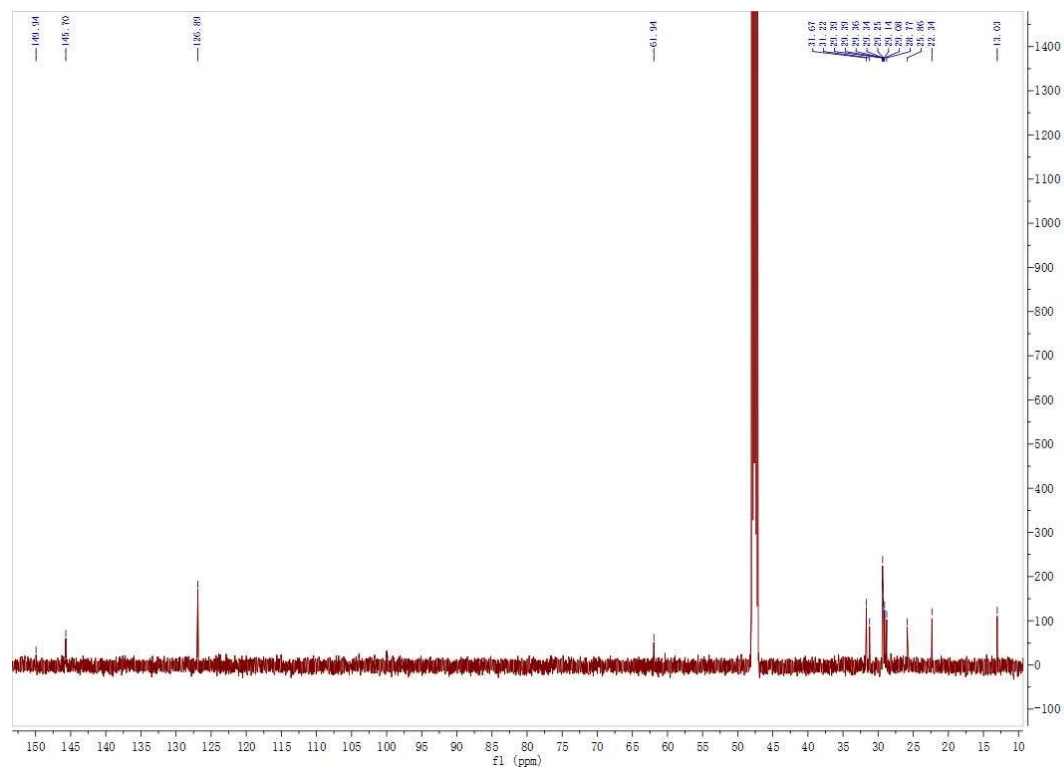

**Figure S8.** (a)  $^1\text{H}$  NMR spectrum of **8** in  $\text{CD}_3\text{OD}$ ; (b)  $^{13}\text{C}$  NMR spectrum of **8** in  $\text{CD}_3\text{OD}$ .

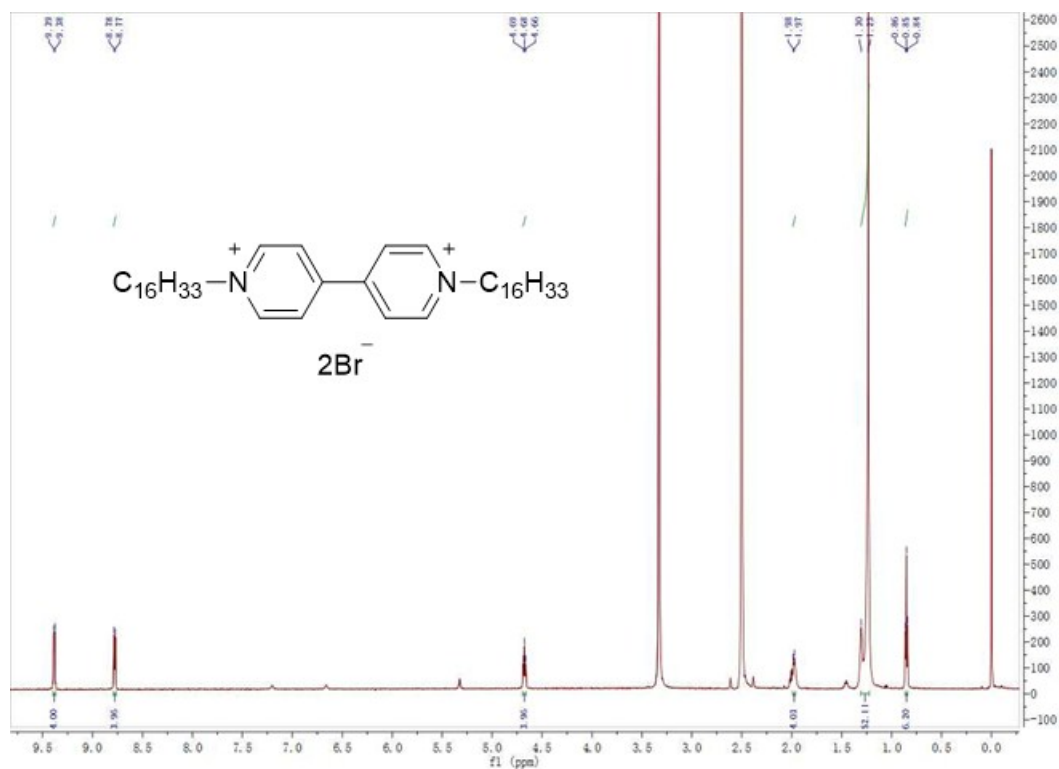

Figure S9.  $^1\text{H}$  NMR spectrum of 9 in  $\text{DMSO-}d_6$ .

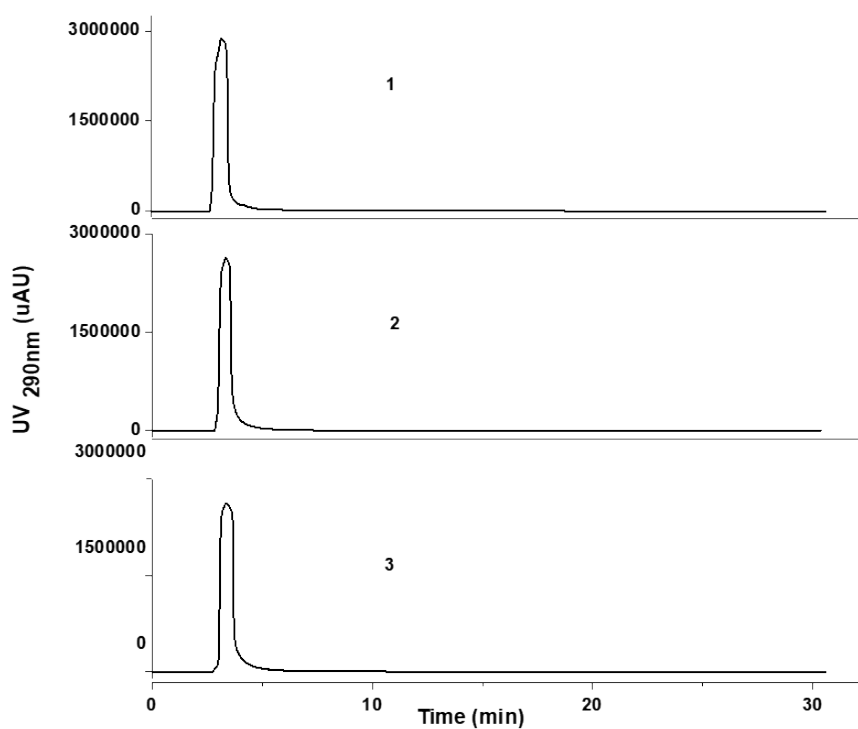

Figure S10. HPLC traces of 1-3.



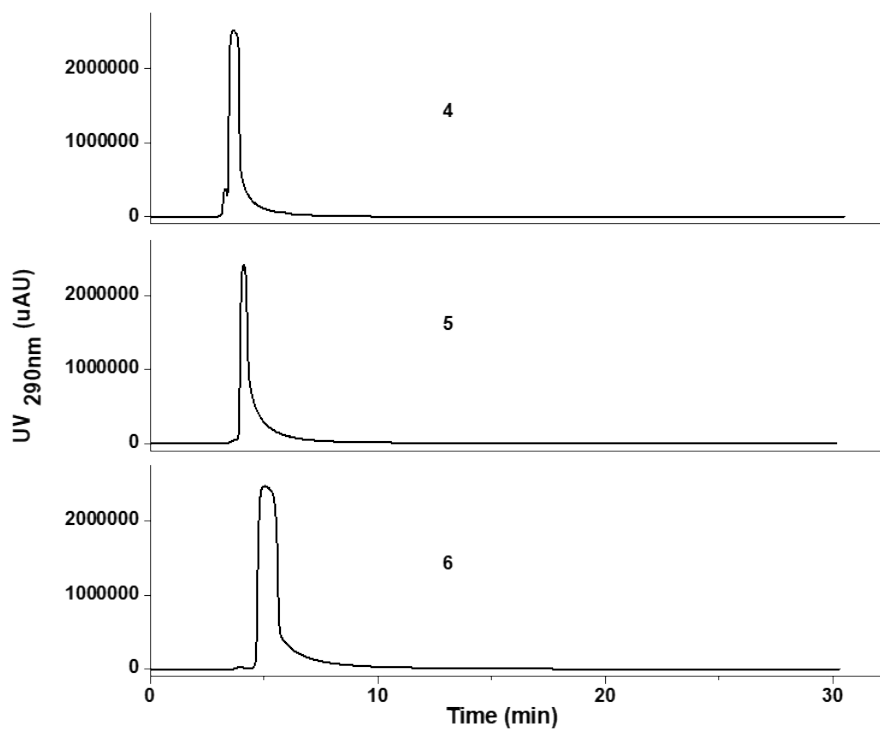

Figure S11. HPLC traces of 4-6.

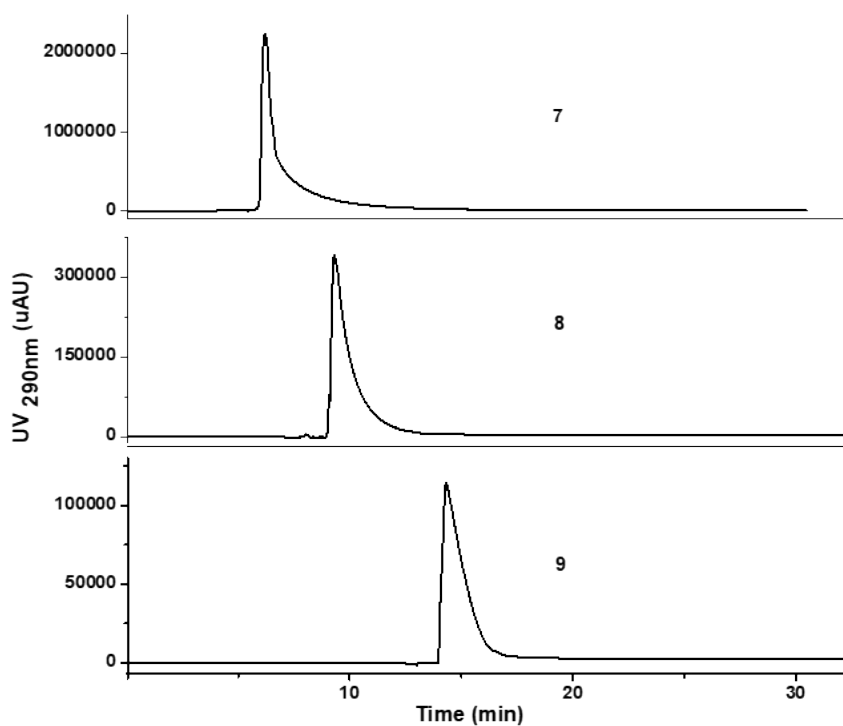

Figure S12. HPLC traces of 7-9.

**Table S1.** Calculated CLog P of the Compounds **1-9** using the program ChemDraw 14.0.

| Compound | <b>1</b> | <b>2</b> | <b>3</b> | <b>4</b> | <b>5</b> | <b>6</b> | <b>7</b> | <b>8</b> | <b>9</b> |
|----------|----------|----------|----------|----------|----------|----------|----------|----------|----------|
| CLog P   | -1.25    | -0.19    | 0.87     | 1.93     | 2.99     | 4.04     | 5.10     | 6.16     | 7.22     |
